# Supplementary material for: 4D printing of a self-morphing polymer driven by a swellable guest medium
Source: Royal Society of Chemistry journal article supplement (doi:10.1039/c7sm01796k), 2017-12-15
Supplement: c7sm01796k1.pdf [file c7sm01796k1.pdf]

### Supporting information

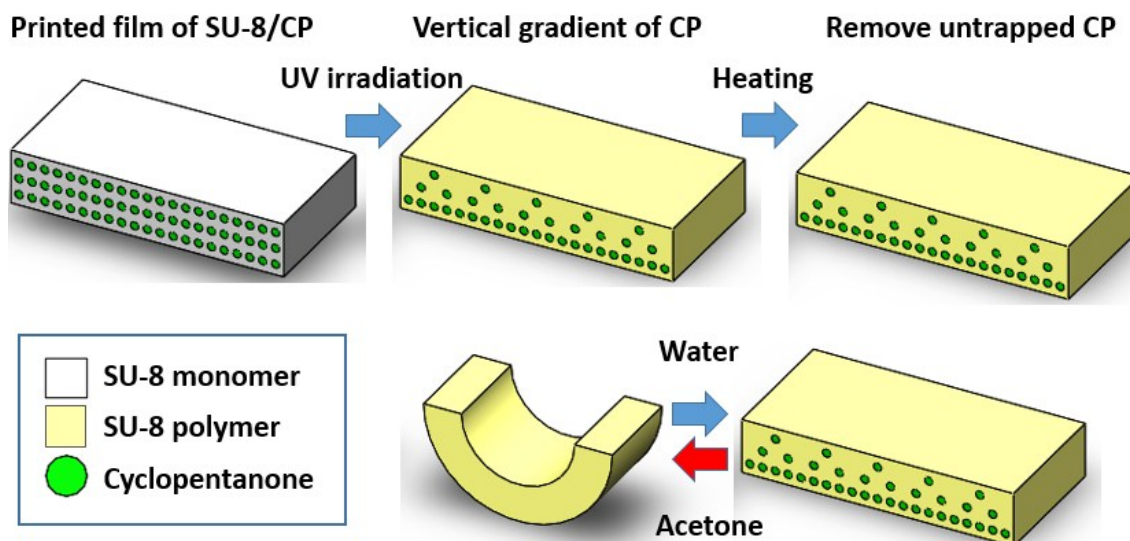

**Figure S1.** Schemes of fabrication process for programmable SU-8 gel film driven by a gradient concentration of swellable CP guest medium.

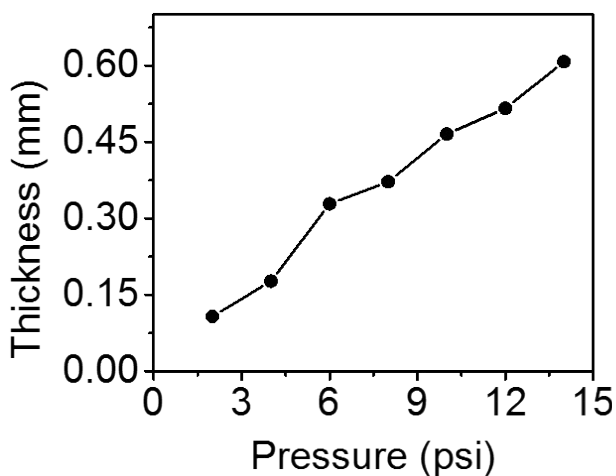

**Figure S2.** Effect of air pump pressure on the thickness (nozzle diameter: 300  $\mu\text{m}$ )

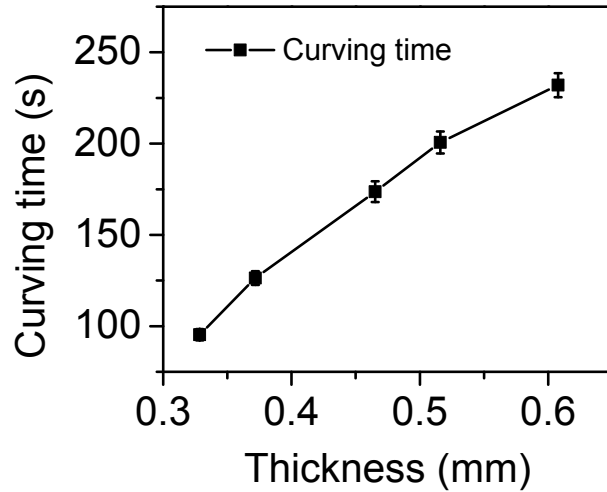

**Figure S3.** Relationship between the thickness and curving time.

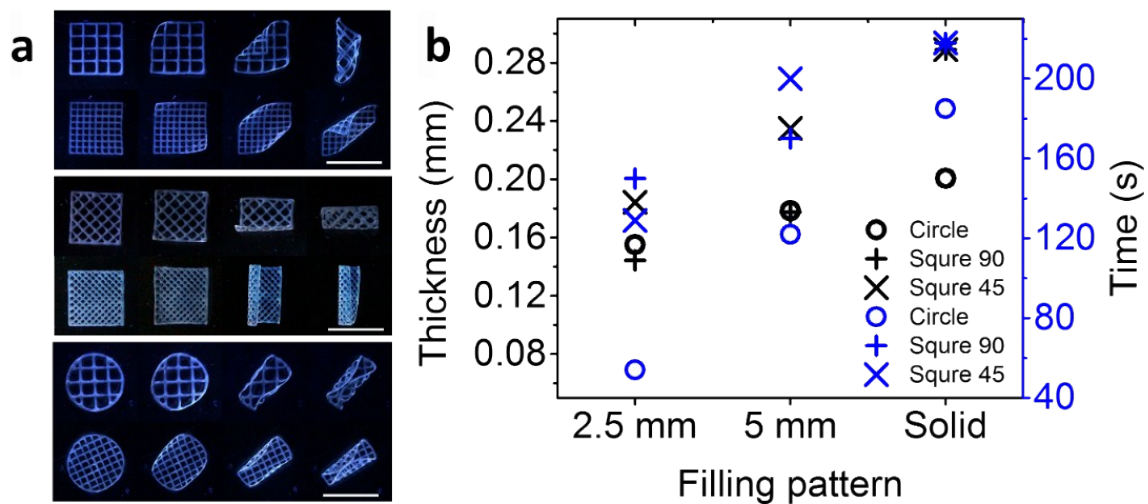

**Figure S4.** Orientation of designed pattern (a) 20 mm  $\times$  20 mm square with 2.5 mm, 4 mm, 5 mm spacing filling pattern and 90 degree interlocked contour; 20 mm  $\times$  20 mm square with 2.5 mm, 4 mm, 5 mm spacing filling pattern and 45 degrees interlocked contour; 20 mm diameter circle with different line segment, 2.5 mm, 5 mm and solid (scale bars: 20 mm). (b) Effect of thickness on response time for different filling patterns.
